# Supplementary material for: Defective Interfering Genomes and the Full-Length Viral Genome Trigger RIG-I After Infection With Vesicular Stomatitis Virus in a Replication Dependent Manner
Source: Front Immunol. 2021 Apr 30;12:595390. doi: 10.3389/fimmu.2021.595390 (PMC8119886; doi:10.3389/fimmu.2021.595390)
Supplement: Supplementary file 1 [file DataSheet_1.pdf]

## Supplementary figures and tables

Figure S1

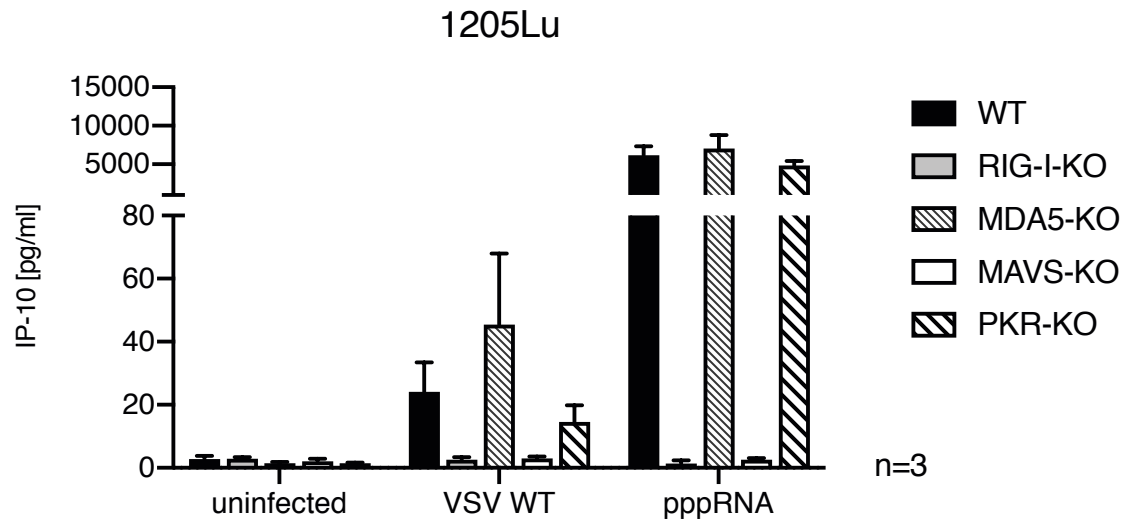

**Supplementary figure S1: The early interferon-response after infection with VSV depends on intact RIG-I signaling but does not require MDA5 or PKR.**

1 x 10<sup>5</sup> Wt 1205 Lu cells and knockout variants for RIG-I, MDA5, MAVS and PKR generated by CRISPR-Cas9-mediated gene-editing were seeded in triplicates overnight in 96 well plates, and either infected with VSV wt (MOI = 1), lipofected with a known RIG-I stimulating triphosphate RNA (pppRNA; 500 ng/ml) or left untreated. 24 h later IP-10 was measured in the supernatant by ELISA. Data are shown as mean ± SEM of n=3.

Figure S2

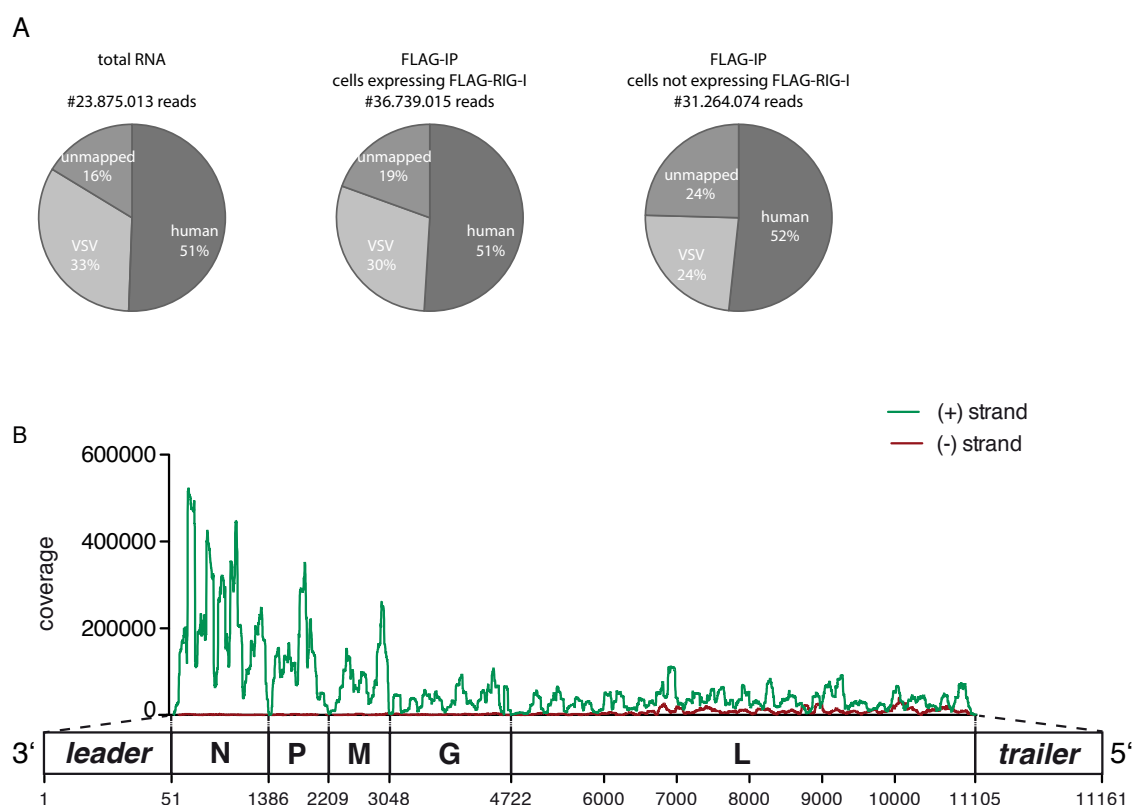

**Supplementary figure S2: The majority of RNAs co-immunoprecipitated with anti-FLAG antibody-coated sepharose beads from lysates of VSV-infected cells are unspecifically bound endogenous host RNAs and viral mRNA transcripts.**

HEK 293 cells expressing FLAG-RIG-I or not were infected with VSV (MOI=1). 9 hours later cell lysates were prepared and either used directly for RNA isolation or first immunoprecipitated with anti-FLAG antibody-coupled sepharose beads. FLAG-RIG-I/RNA complexes were then eluted from the beads and RNA was isolated from eluates. RNA from the input and RNA from the eluate was used to generate cDNA libraries for next generation sequencing on an Illumina Genome Analyzer. Reads were aligned to the human genome and the VSV reference genome. (A) The relative proportions of reads aligning to the VSV genome, the human genome and unaligned reads were calculated for each condition. One representative experiment of n=2 is shown B) Sequencing reads of a cDNA library generated from VSV-infected cells prior to immunoprecipitation were aligned to the VSV genome reference in positive orientation (green) and negative orientation (red) and are depicted on the y-axis as coverage defined as the number of sequence reads that contain each specific position of the reference genome represented on the x-axis. The x-axis has a resolution of single nucleotide-positions. A schematic representation of the VSV genome underlines the x-axis and is in areas of the trailer and leader sequences not true to scale. One representative experiment out of n=2 is shown.

Figure S3

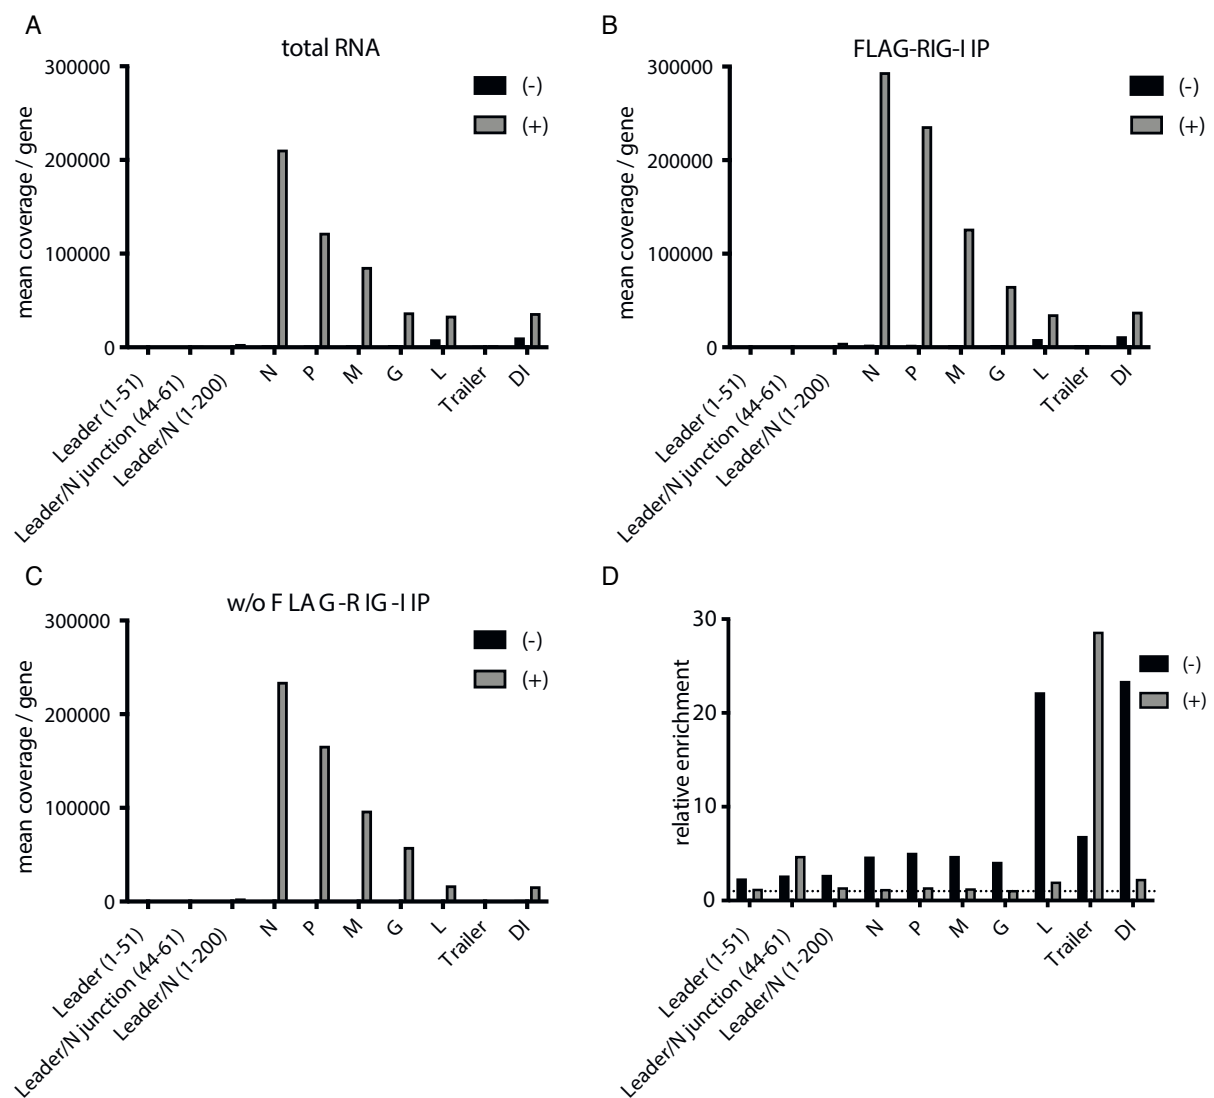

**Supplementary figure S3: RIG-I-associated RNAs after VSV infection phenocopy the viral mRNA gradient present in the cytoplasm and are specifically enriched for defective-interfering genomes and genomic VSV sequences in negative orientation.**

HEK 293 cells expressing FLAG-RIG-I or not were infected with VSV (MOI=1). 9 hours later cell lysates were prepared and either used directly for RNA isolation (A) or first immunoprecipitated with anti-FLAG antibody-coupled sepharose beads. RNA from the input and RNA from the eluate was used to generate cDNA libraries for next-generation sequencing on an Illumina Genome Analyzer. Sequence reads were aligned with the cRNA sequence of the VSV genome and a de-novo assembled sequence of the 4719 nucleotides long panhandle DI genome identified in figure 5. For the VSV genes N, P, M, G and L, the trailer and leader sequence (nucleotide 1 - 51), the leader-N junction (nucleotide 44 - 61) the leader-N region (nucleotide 1 – 200) as well as the DI genome the mean coverage with reads in positive (+) and negative (–) orientation was calculated by counting the number of all reads aligning to one of the depicted gene sections normalized to the length of the respective gene section. Data are shown from RNA isolated prior to immunoprecipitation (A) or co-immunoprecipitated with anti-FLAG antibodies (B,C) from cells overexpression RIG-I-FLAG (B) or not (C). In D the relative enrichment is depicted by dividing the coverage of B and C. One representative experiment of n=2 is shown.

Figure S4

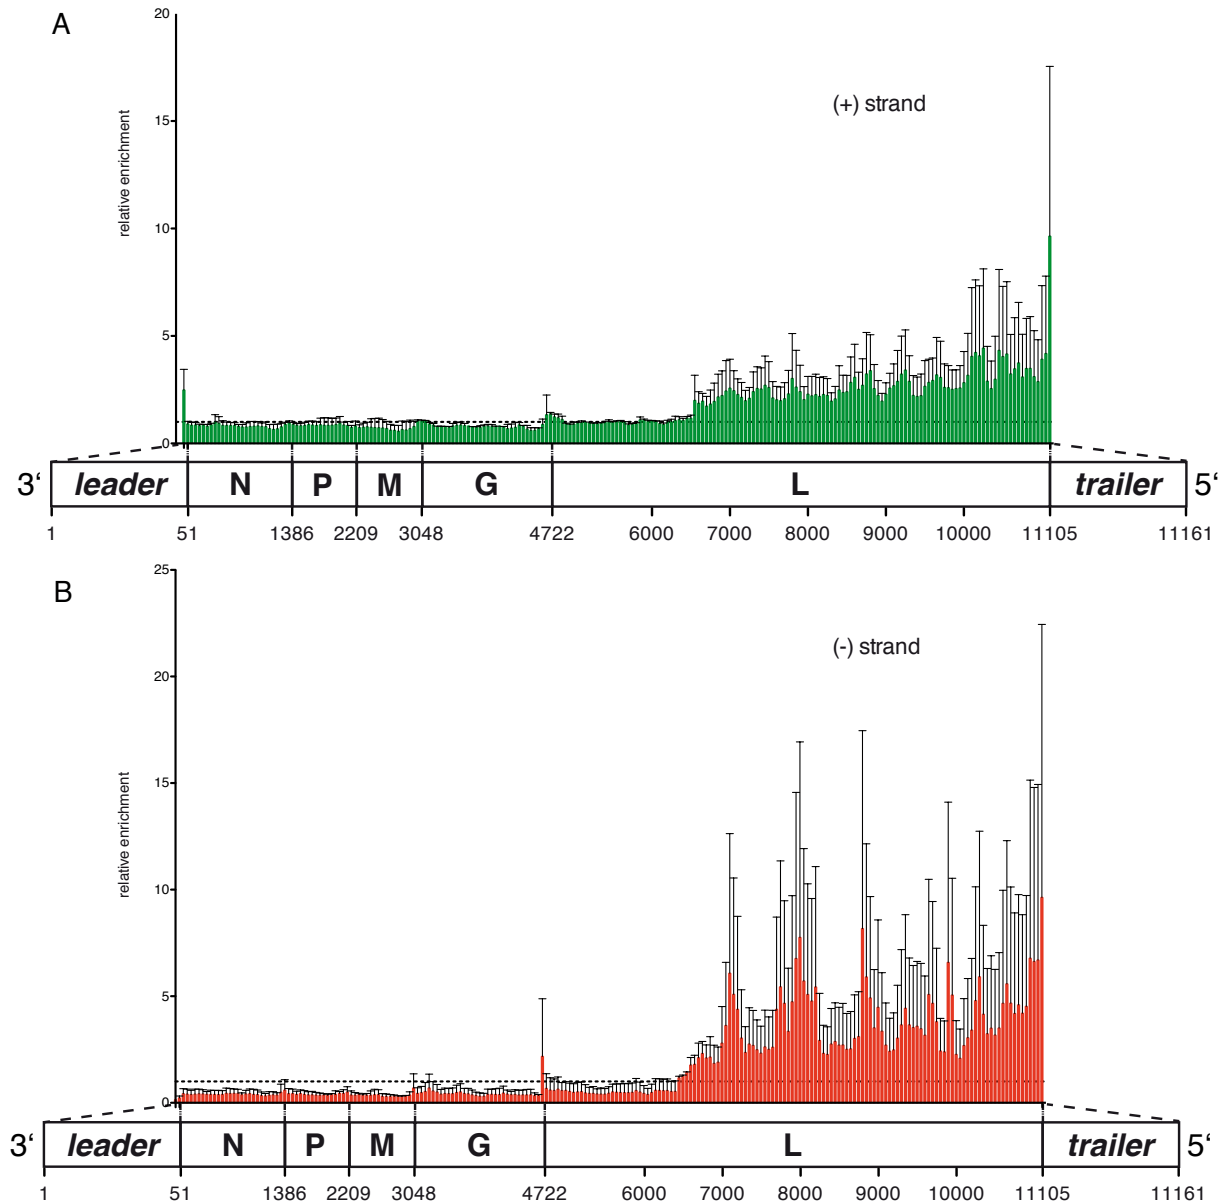

**Supplementary figure S4: RIG-I-associated RNAs after VSV infection is enriched for DI genome sequences of positive and negative orientation.**

HEK 293 cells ( $40 \times 10^6$ ) expressing FLAG-RIG-I or not were infected with VSV (MOI=1). 9 hours later lysates were prepared and RIG-I/RNA complexes were immunoprecipitated with anti-FLAG-coupled sepharose beads. After elution of the protein/RNA complexes from the beads, RNA was purified from the eluate and used to generate cDNA libraries for next generation sequencing on an Illumina Genome Analyzer. To combine the data from two independent experiments the read sequences were aligned in 50-nucleotide windows to the cRNA sequence of the VSV genome and normalized to the complete number of sequences in each condition aligning to the VSV genome. Data show the relative enrichment on the y-axis by calculating the ratio of the coverage in 50-nucleotide-windows in samples containing RIG-I divided by the coverage in the negative control without RIG-I. A schematic representation of the VSV genome underlines the x-axis and is in areas of the trailer and leader sequences not true to scale. The analysis was performed separately for sequences aligning to the VSV genome in positive orientation (green) (A) and negative orientation (red) (B). The dotted line marks 1. Data are shown as mean  $\pm$  SD of  $n=2$ .

Figure S5

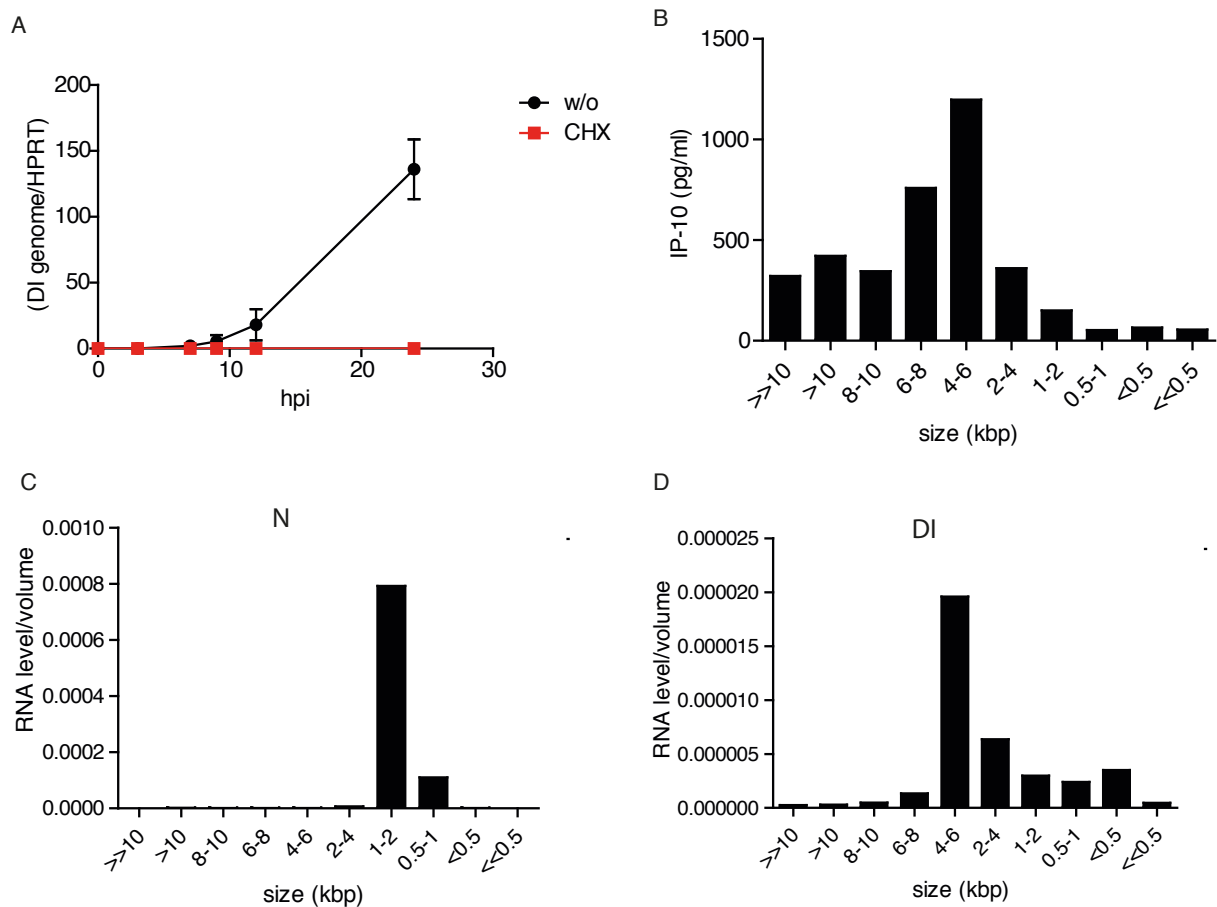

**Supplementary figure S5: After VSV wt infection DI genomes replicate in a cycloheximide-sensitive manner and form the main immunostimulatory RNA that co-immunoprecipitates with RIG-I.**

(A) HEK 293 cells were treated or not with cycloheximide (CHX, 100  $\mu$ g/ml) 30 min prior to infection with VSV (MOI=1) and lysed at the indicated time points post infection. RNA was isolated and analysed by RT-qPCR using specific primers for the 4719 nucleotides DI genome shown in figure 5. Data are shown as mean  $\pm$  SEM of n=3 independent experiments. (B-D) HEK 293 cells expressing FLAG-RIG-I were infected with VSV (MOI=1). 24 hours later lysates were prepared and RIG-I/RNA complexes were immunoprecipitated with anti-FLAG antibody-coupled sepharose beads. After elution RNA was purified from the eluate and subjected to size-dependent separation on an agarose gel. RNA of the indicated sizes was recovered from ten slices and (B) used for re-transfection into 1205Lu cells. IP-10 in the supernatant was measured 24 h after transfection. (C, D) To validate the size-dependent separation of VSV RNA species equal volume of RNA from each slice was analyzed by RT-qPCR for the presence of the N-RNA (C) and DI genome (D). Quantities were calculated as  $2^{-(Ct-value)}$ . Shown are data of one experiment.

Figure S6

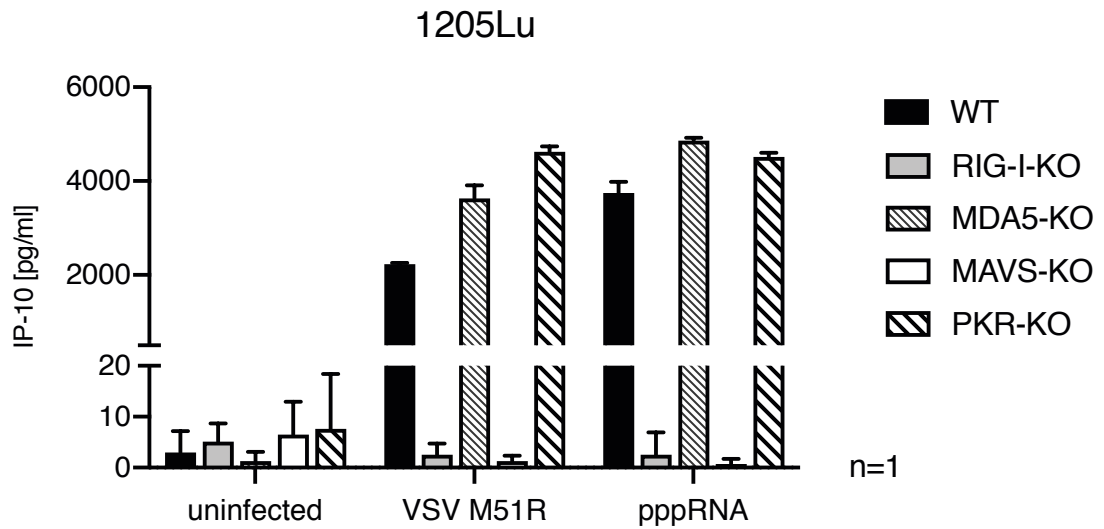

**Supplementary figure S6: The early interferon response after infection with VSV M51R depends on intact RIG-I signaling but does not require MDA5 or PKR.**

1 x 10<sup>5</sup> Wt 1205 Lu cells and knockout variants for RIG-I, MDA5, MAVS and PKR generated by CRISPR-Cas9-mediated gene-editing were seeded in triplicates overnight in 96-well plates, and either infected with VSV M51R (P0) (MOI = 1), lipofected with a known RIG-I stimulating triphosphate RNA (pppRNA; 500 ng/ml) or left untreated. 24 h later IP-10 was measured in the supernatant by ELISA. Data are shown as mean ± SEM of triplicates (n=1) and are representative for three closely related experiments with similar results.

Figure S7

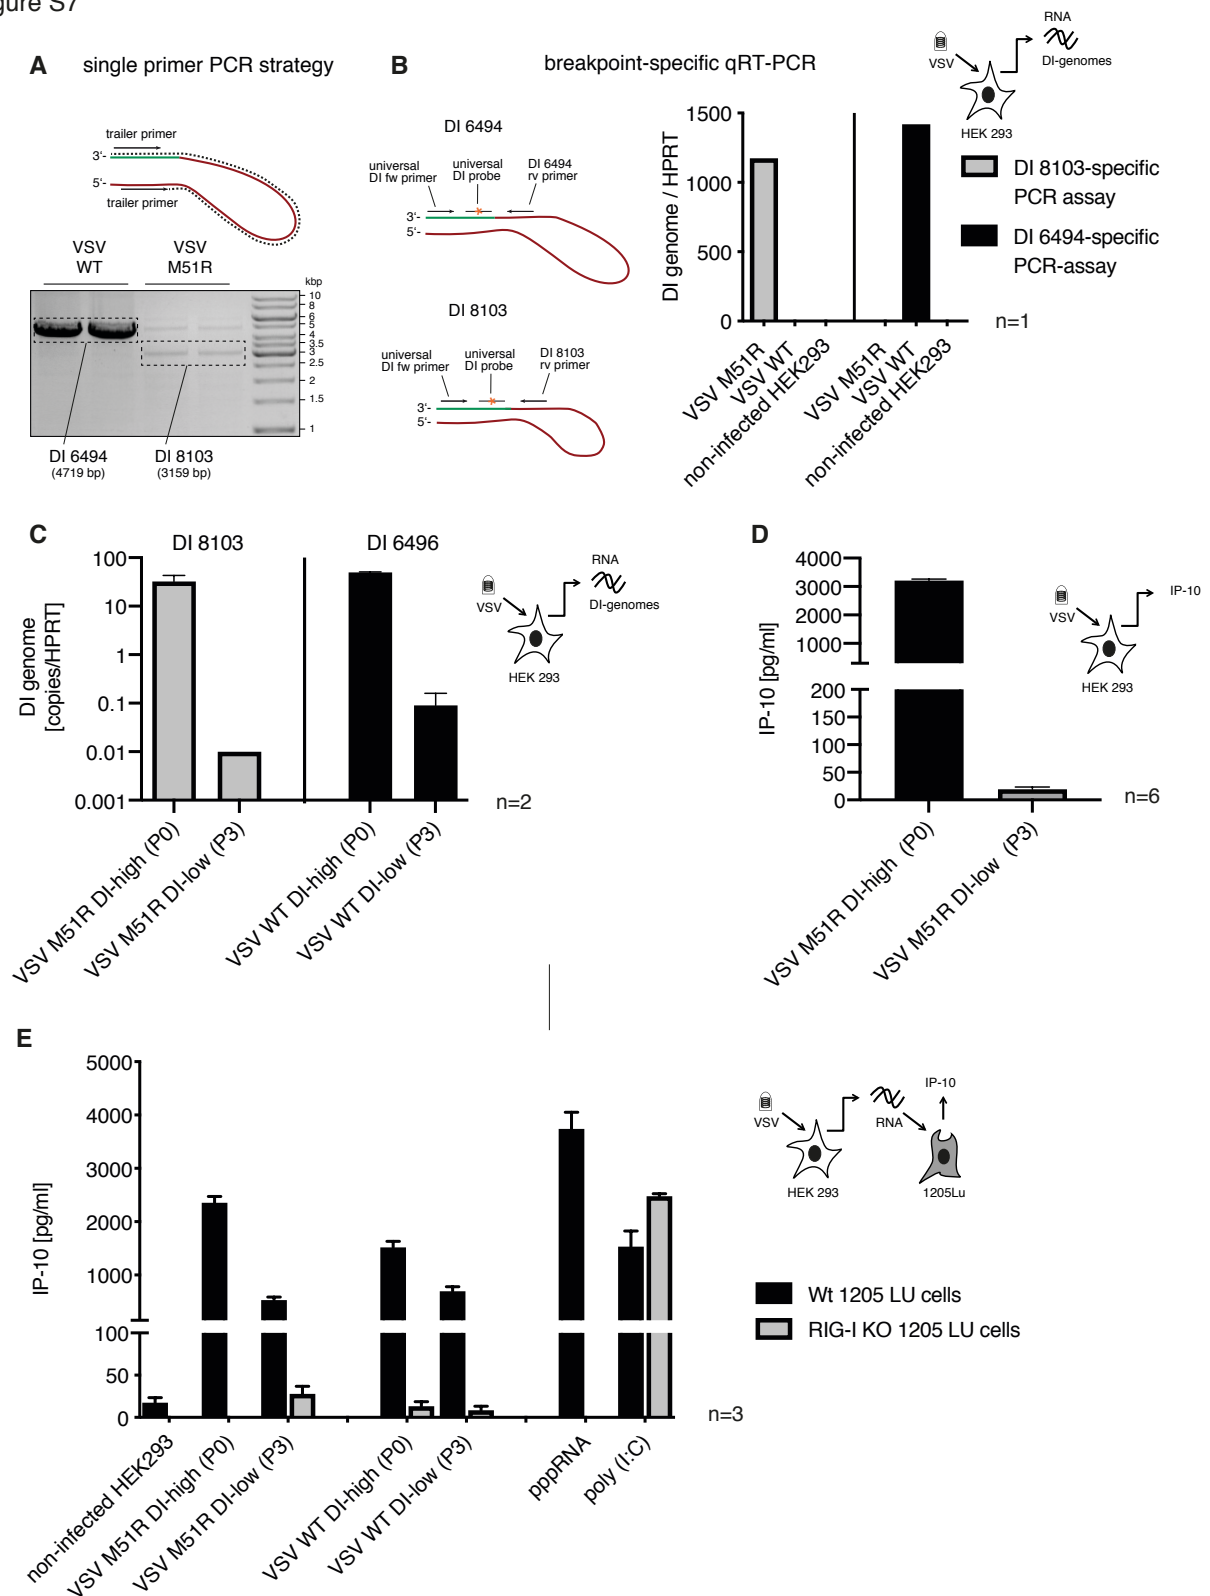

**Supplementary figure S7: Stocks of the VSV M51R mutant containing a 3159 nucleotide long defective-interfering genome lose most of their RIG-I stimulating capacity after depletion of the DI genome**

(A) RNA isolated from BHK cells 24 h after infection with either VSV wt stocks or stocks of the VSV M51R mutant was reverse transcribed and amplified using the single primer PCR-

strategy schematically depicted. This approach is based on a single primer that binds RNA-sequences contained in the trailer sequence of VSV and only gives a product in the presence of sequences that contain the trailer sequence on the 5' end and its reverse complementary sequence on the 3' end. PCR products were analyzed on an agarose gel and the known 4719 bp long DI genome with its breakpoint at position 6494 (DI 6494) in the VSV wt stocks served as a positive control for the assay. (B) Reisolation of DNA and sequencing of the 3159 bp band from the VSV M51R stock identified a copyback DI genome with a breakpoint at position 8103 (DI 8103) and allowed the design of specific RT-qPCR assays for the two DI genomes schematically depicted. Analysis of RNA isolated from HEK cells infected for 24 h (MOI = 1) with VSV M51R or VSV wt gave specific signals in these RT-qPCR assays without "cross contamination". RNA isolated from non-infected HEK cells served as a negative control.

(C-E) HEK 293 cells were infected with VSV M51R or VSV wt (MOI =1) using virus stocks containing either high (P0) or low (P3) amounts of DI genomes. 24 h post infection supernatants were harvested, the infected cells were lysed and their RNA was isolated. (C) The isolated RNA was transcribed to cDNA and was analysed by RT-qPCR for the amount of DI genomes using the indicated DI-specific PCR assays. (D) IP-10 was measured in the harvested supernatants by ELISA. (E) The isolated RNA was retransfected into 1205Lu wt and RIG-I deficient cells (100 ng/100  $\mu$ l) using RNAiMax lipofectamin. IP-10 in the supernatant was measured 24 h after transfection by ELISA. pppRNA (500 ng/ml) and Poly (I:C) (100ng/ml) were used as RIG-I-dependent and RIG-I-independent controls respectively. Data are represented as mean  $\pm$  SEM of n=1-6 independent experiments as indicated.

Diagram illustrating the structure of the FL genome and its fragments. The top part shows the FL genome with segments N, P, M, G, and L. Below it, fragments DI 011, DI-T, DI 8103, DI-T(L), DI 611, and DI 6494 are shown, each with a corresponding legend for (-) strand (white) and (+) strand (black).

Legend:

- (-) strand (white)
- (+) strand (black)

Fragment details:

| Fragment | Strand     | Source                     |
|----------|------------|----------------------------|
| DI 011   | (-) strand | Lazzarini et al. 1975      |
| DI 011   | (+) strand | Schubert et Lazzarini 1981 |
| DI-T     | (-) strand | Meier et al. 1984          |
| DI 8103  | (-) strand | this study                 |
| DI-T(L)  | (-) strand | Meier et al. 1984          |
| DI 611   | (-) strand | Meier et al. 1984          |
| DI 6494  | (-) strand | this study                 |

Several VSV defective interfering (DI-) genomes with distinct breakpoints within the L gene have been described so far (Lazzarini et al., 1975; Schubert and Lazzarini, 1981; Meier et al., 1984). These DI genomes all consist of the 5'-sequence of the full-length (FL) genome that extends to the L gene to varying degrees. The copy-back DI genomes have a reverse complementary trailer sequence (*trailer'*) attached to their 3'-end.

Figure adopted and modified from (Meier et al., 1984)

Meier, E., Harmison, G.G., Keene, J.D., and Schubert, M. (1984). Sites of copy choice replication involved in generation of vesicular stomatitis virus defective-interfering particle RNAs. *J Virol* 51(2), 515-521.

9

Supplementary table 1: RT-qPCR primer list

| Name       | Probe                                                           | Sequence Primer 1 (left) (5'-3') | Sequence Primer 2 (right) (5'-3') | Region on VSV genome covered by amplificate (3'-5') | Reverse Transcription Primer                                        |
|------------|-----------------------------------------------------------------|----------------------------------|-----------------------------------|-----------------------------------------------------|---------------------------------------------------------------------|
| Human HPRT | Roche UPL #73                                                   | TGACCTTGATTTATTTTGCATACC         | CGAGCAAGACGTTTCAGTCCT             | -                                                   | Random Hexamer Primer (Thermo scientific)                           |
| Leader     | Custom made (TIB MOLBIOL) 6FAM-CCTGAGCCTTTTAATGATAA--BBQ        | ACGAAGACAAACAAACCAT              | GCCTCTCATGCTGACGAAT               | 1 - 50                                              | Custom made (TIB MOLBIOL) GCCTCTCA TGCTGACGAATTTTGAGAGGC AAAGTTTC A |
| Leader/N   | Roche UPL #2                                                    | CGAAGACAAACAAACCATTATTATCA       | GTTGTCAATGATTCTCTTGACTGTAAC       | 1 – 96                                              | Random Hexamer Primer                                               |
| N          | Roche UPL #85                                                   | CGAAGACAAACAAACCATTATTATCA       | TCTGCAACTTCTCGGTTCAA              | 766 - 830                                           | Random Hexamer Primer                                               |
| P          | Roche UPL #7                                                    | GCAGAGTGCACATTTGAAGC             | AGTTATCTGGCGCTCCTTCAT             | 1858 - 1917                                         | Random Hexamer Primer                                               |
| M          | Roche UPL #60                                                   | GCGAAGGCAGGGCTTATT               | GCTCTGGTACATTGAGCATGG             | 2653 - 2718                                         | Random Hexamer Primer                                               |
| G          | Roche UPL #71                                                   | TGGTTCGAGATGGCTGATAA             | ACTTGACCCTTCTGGGCATT              | 3831 - 3899                                         | Random Hexamer Primer                                               |
| L          | Roche UPL #62                                                   | CCTTTAGAAGGGAATTGGAAGAA          | TCTGCCGACTTGATAGGATTG             | 8765 - 8824                                         | Random Hexamer Primer                                               |
| L/Trailer  | Custom made (TIB MOLBIOL) 6FAM-TCTTGTGGTTTTTATT TTTTATCTGG--BBQ | CATGAGGAGACTCCAAAC               | GACGAAGACCACAAAACC                | 11068 - 11161                                       | Random Hexamer Primer                                               |

|              |                                                                           |                       |                         |               |                       |
|--------------|---------------------------------------------------------------------------|-----------------------|-------------------------|---------------|-----------------------|
| Trailer      | Custom made (TIB<br>MOLBIOL) 6FAM-<br>TCTTGTGGTTTTTATT<br>TTTTATCTGG--BBQ | GGCTTTGATCCTTAAGACC   | GACGAAGACCACAAAACC      | 11103 - 11161 | Random Hexamer Primer |
| IFN- $\beta$ | Roche UPL #25                                                             | CGACACTGTTCGTGTGTCA   | GAGGCACAACAGGAGAGCAA    | -             | Random Hexamer Primer |
| DI6494       | Custom made (TIB<br>MOLBIOL) 6FAM-<br>TCTTGTGGTTTTTATT<br>TTTTATCTGG--BBQ | CGCGGGACGAAGACCACAAAA | GCCGTTTGATAACTTCCTTTGGG |               | Random Hexamer Primer |
| DI8103       | Custom made (TIB<br>MOLBIOL) 6FAM-<br>TCTTGTGGTTTTTATT<br>TTTTATCTGG--BBQ | CGCGGGACGAAGACCACAAAA | CGTGAATAAGACGTCATGGATC  |               | Random Hexamer Primer |
